### Population genomic screening of all young adults in Australia to detect familial hypercholesterolemia: a cost-effectiveness analysis

Z. Ademi<sup>1</sup>, C. Marquina<sup>1</sup>, P. Lacaze<sup>1</sup>, J. Tiller<sup>1</sup>, M. Riaz<sup>1</sup>, A.C. Sturm<sup>2</sup>, M. Nelson<sup>1</sup>, B.A. Ference<sup>3</sup>, J. Pang<sup>4</sup>, G.F. Watts<sup>4</sup>, S.J. Nicholls<sup>1</sup>, S. Zoungas<sup>1</sup>, D. Liew<sup>1</sup>, J. McNeil<sup>1</sup>

<sup>1</sup>Monash University, Melbourne, Australia; <sup>2</sup>Genomic Medicine Institute, Geisinger, United States of America; <sup>3</sup>University of Cambridge, Cambridge, United Kingdom; <sup>4</sup>The University of Western Australia, Perth, Australia

**Funding Acknowledgement:** Type of funding sources: Foundation. Main funding source(s): This work was supported by the Australian National Heart Foundation and Monash University Faculty of Medicine, Nursing and Health Sciences

**Background:** Heterozygous familial hypercholesterolemia (FH) is a highly-penetrant, autosomal dominant monogenic disorder that causes elevated plasma low-density cholesterol (LDL-C) levels and risk of premature coronary heart disease (CHD). To date, the cost-effectiveness of the emerging strategy of genomic screening of adult populations for FH has not been investigated.

**Purpose:** To assess the impact and cost-effectiveness of offering population genomic screening to all young adults in Australia to detect heterozygous familial hypercholesterolemia (FH).

**Methods:** We designed a decision analysis model to compare the current standard of care for heterozygous FH diagnosis in Australia (opportunistic cholesterol screening and genetic cascade testing) with population genomic screening of adults aged 18–40 years to detect pathogenic variants in the LDLR/APOB/PCSK9 genes. The model captured morbidity/mortality due to coronary heart disease (CHD) over a lifetime horizon,

from a healthcare perspective. Risk of CHD, treatment effects, prevalence, and healthcare costs were estimated from published studies. Outcomes included quality adjusted life years (QALYs), costs and incremental cost-effectiveness ratio (ICER), discounted 5% annually. Sensitivity analyses were undertaken to explore the impact of key input parameters on the robustness of the model. The model structure was designed to be transferable to countries with different healthcare systems.

**Results:** Over the lifetime of the population (4,167,768 men; 4,129,961 women), the model estimated a gain of 62,722 years of life lived and 73,959 QALYs due to CHD prevention. Population genomic screening for FH would be cost-effective from a healthcare perspective if the cost per test was ≤AU\$300 (~US\$233) which would yield an ICER AU\$28,000 cost-saving.

**Conclusion:** Based on our model, offering population genomic screening to all young adults to detect FH could be cost-effective in the Australian healthcare system, at testing costs that are currently feasible.

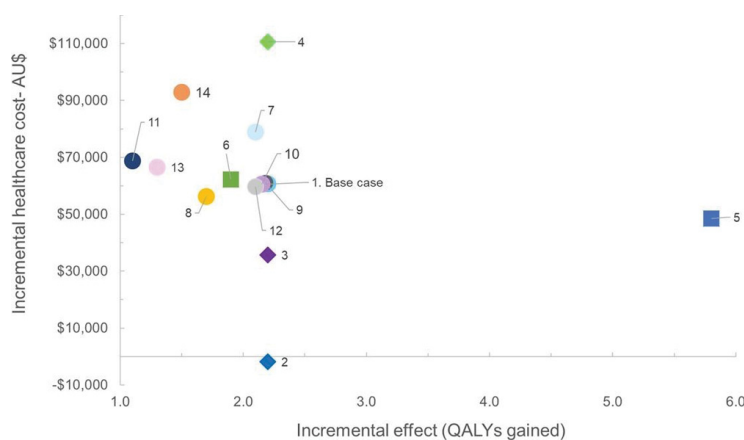

- 1. Base-case (cost per genetic test AU\$300)
- 2. Cost per genetic test: AU\$50
- 3. Cost per genetic test: AU\$200
- 4. Cost per genetic test: AU\$500
- 5. Decrease discounting rate to 0%
- 6. Increase discounting rate to 6%
- 7. Underlying FH prevalence of 1:311
- 8. Decrease % of fatal CHD to half of base-case value
- 9. Increase detected cases of FH in standard of care to 10%
- 10. Increase to 75% the proportion of FH treated in SoC
- 11. Reduce treatment effect size to HR 0.5
- 12. Use SMR from Masana et al. for 'Alive, with CHD'
- 13. Reduce adherence to statins to 75% in intervention cohort
- 14. Reducing the uptake of screening to 70%

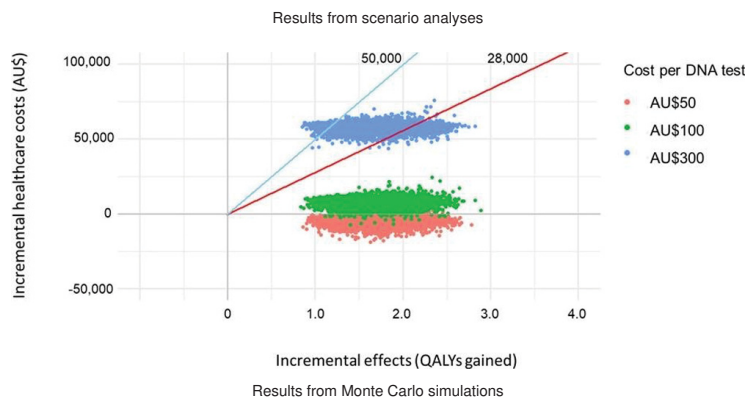

Downloaded from https://academic.oup.com/eurheartj/article/42/Supplement\_1/ehab724.2727/6393207 by guest on 17 April 2024
